# Supplementary material for: Family History of Head and Neck Cancers
Source: MDPI journal article supplement (doi:10.3390/cancers13164115), 2021-08-16
Supplement: s1 [file s1]

**Table S1.** Characteristics of the study population of head and neck cancer with and without family history of head and neck cancer, 1958–2018.

| Definition                                                  | With Family History of Head and Neck Cancer |       | Non family History of Head and Neck Cancer |       |
|-------------------------------------------------------------|---------------------------------------------|-------|--------------------------------------------|-------|
|                                                             | No.                                         | %     | No.                                        | %     |
| <b>Population (<i>n</i> = 9,338,882)</b>                    | 92117                                       | 100.0 | 9,246,765                                  | 100.0 |
| Men ( <i>n</i> = 4,792,416)                                 | 47033                                       | 51.1  | 4,745,383                                  | 51.3  |
| Women ( <i>n</i> = 4,546,466)                               | 45084                                       | 48.9  | 4,501,382                                  | 48.7  |
| <b>Total case of head and neck cancer</b>                   |                                             |       |                                            |       |
| <i>n.</i> of case ( <i>n</i> = 13,067) (% of all cases)     | 450                                         | 3.4   | 12617                                      | 96.6  |
| Mean age at diagnosis ( $\pm$ SD)                           | 58.7 $\pm$ 10.7                             |       | 58.4 $\pm$ 12.2                            |       |
| Incidence rate (per 100 000 person years), 95% CI           | 9.77, 8.86–10.67                            |       | 3.93, 3.86–4.00                            |       |
| <b>Men</b>                                                  |                                             |       |                                            |       |
| <i>n.</i> of case ( <i>n</i> = 9007)                        | 315                                         | 70.0  | 8692                                       | 68.9  |
| Mean age at diagnosis ( $\pm$ SD)                           | 58.9 $\pm$ 9.9                              |       | 58.6 $\pm$ 11.6                            |       |
| Incidence rate (per 100 000 person years), 95% CI           | 13.49, 12.00–14.99                          |       | 5.30, 5.19–5.41                            |       |
| <b>Women</b>                                                |                                             |       |                                            |       |
| <i>n.</i> of case ( <i>n</i> = 4060)                        | 135                                         | 30.0  | 3925                                       | 31.1  |
| Mean age at diagnosis ( $\pm$ SD)                           | 58.1 $\pm$ 12.5                             |       | 57.8 $\pm$ 13.6                            |       |
| Incidence rate (per 100 000 person years), 95% CI           | 5.94, 4.94–6.94                             |       | 2.50, 2.42–2.58                            |       |
| <b>Subtypes of head and neck cancer (<i>n</i> = 13,067)</b> | 450                                         | 100.0 | 12617                                      | 100.0 |
| Lip (ICD-7 140, <i>n</i> = 1331)                            | 43                                          | 9.6   | 1288                                       | 10.2  |
| Tongue (ICD-7 141, <i>n</i> = 2915)                         | 83                                          | 18.4  | 2832                                       | 22.4  |
| Mouth floor (ICD7 143, <i>n</i> = 622)                      | 33                                          | 7.3   | 589                                        | 4.7   |
| Other mouth (ICD-7 144, <i>n</i> = 1752)                    | 58                                          | 12.9  | 1694                                       | 13.4  |
| Oropharynx (ICD-7 145, <i>n</i> = 3082)                     | 99                                          | 22.0  | 2983                                       | 23.6  |
| Nasopharynx (ICD-7 146, <i>n</i> = 532)                     | 28                                          | 6.2   | 504                                        | 4.0   |
| Hypopharynx (ICD-7 147, <i>n</i> = 655)                     | 28                                          | 6.2   | 627                                        | 5.0   |
| Other pharynx (ICD-7 148, <i>n</i> = 62)                    | 2                                           | 0.4   | 60                                         | 0.5   |
| Larynx (ICD-7 161, <i>n</i> = 2116)                         | 76                                          | 16.9  | 2040                                       | 16.2  |

CI: Confidence interval, SD: Standardized deviation.

**Table S2.** Risks of head and neck cancer among spouses.

| Subtypes of Head and Neck Cancer in Spouse | Head and neck Cancer in Wives |      |        |      | Head and Neck Cancer in Husbands |      |        |      | Head and Neck Cancer in Spouses |      |        |      |
|--------------------------------------------|-------------------------------|------|--------|------|----------------------------------|------|--------|------|---------------------------------|------|--------|------|
|                                            | O                             | SIR  | 95% CI |      | O                                | SIR  | 95% CI |      | O                               | SIR  | 95% CI |      |
| Lip                                        | 17                            | 1.40 | 0.82   | 2.25 | 6                                | 0.93 | 0.33   | 2.03 | 23                              | 1.24 | 0.78   | 1.86 |
| Tongue                                     | 6                             | 0.71 | 0.26   | 1.56 | 13                               | 1.53 | 0.81   | 2.62 | 19                              | 1.12 | 0.67   | 1.76 |
| Mouth floor                                | 5                             | 1.72 | 0.54   | 4.05 | 3                                | 1.41 | 0.27   | 4.17 | 8                               | 1.59 | 0.68   | 3.14 |
| Other mouth                                | 5                             | 0.74 | 0.23   | 1.74 | 7                                | 0.79 | 0.31   | 1.64 | 12                              | 0.77 | 0.40   | 1.35 |
| Oropharynx                                 | 11                            | 1.31 | 0.65   | 2.35 | 6                                | 0.97 | 0.35   | 2.13 | 17                              | 1.17 | 0.68   | 1.87 |
| Nasopharynx                                | 4                             | 1.44 | 0.38   | 3.73 | 3                                | 1.98 | 0.37   | 5.87 | 7                               | 1.63 | 0.65   | 3.39 |
| Hypopharynx                                | 6                             | 1.43 | 0.52   | 3.14 | 1                                | 0.62 | 0.00   | 3.55 | 7                               | 1.21 | 0.48   | 2.50 |
| Larynx                                     | 17                            | 0.98 | 0.57   | 1.57 | 7                                | 1.70 | 0.67   | 3.52 | 24                              | 1.12 | 0.72   | 1.67 |
| All                                        | 71                            | 1.12 | 0.88   | 1.42 | 46                               | 1.17 | 0.85   | 1.56 | 117                             | 1.14 | 0.94   | 1.37 |

O = Observed, SIR = Standardized incidence ratio, CI = Confidence intervals.
